# Supplementary material
Source: PubMed Central journal article supplement (PMC5743432)
Supplement: NIHMS893122-supplement-supplement_1.pdf [file NIHMS893122-supplement-supplement_1.pdf]

## SUPPLEMENTAL FIGURE 1

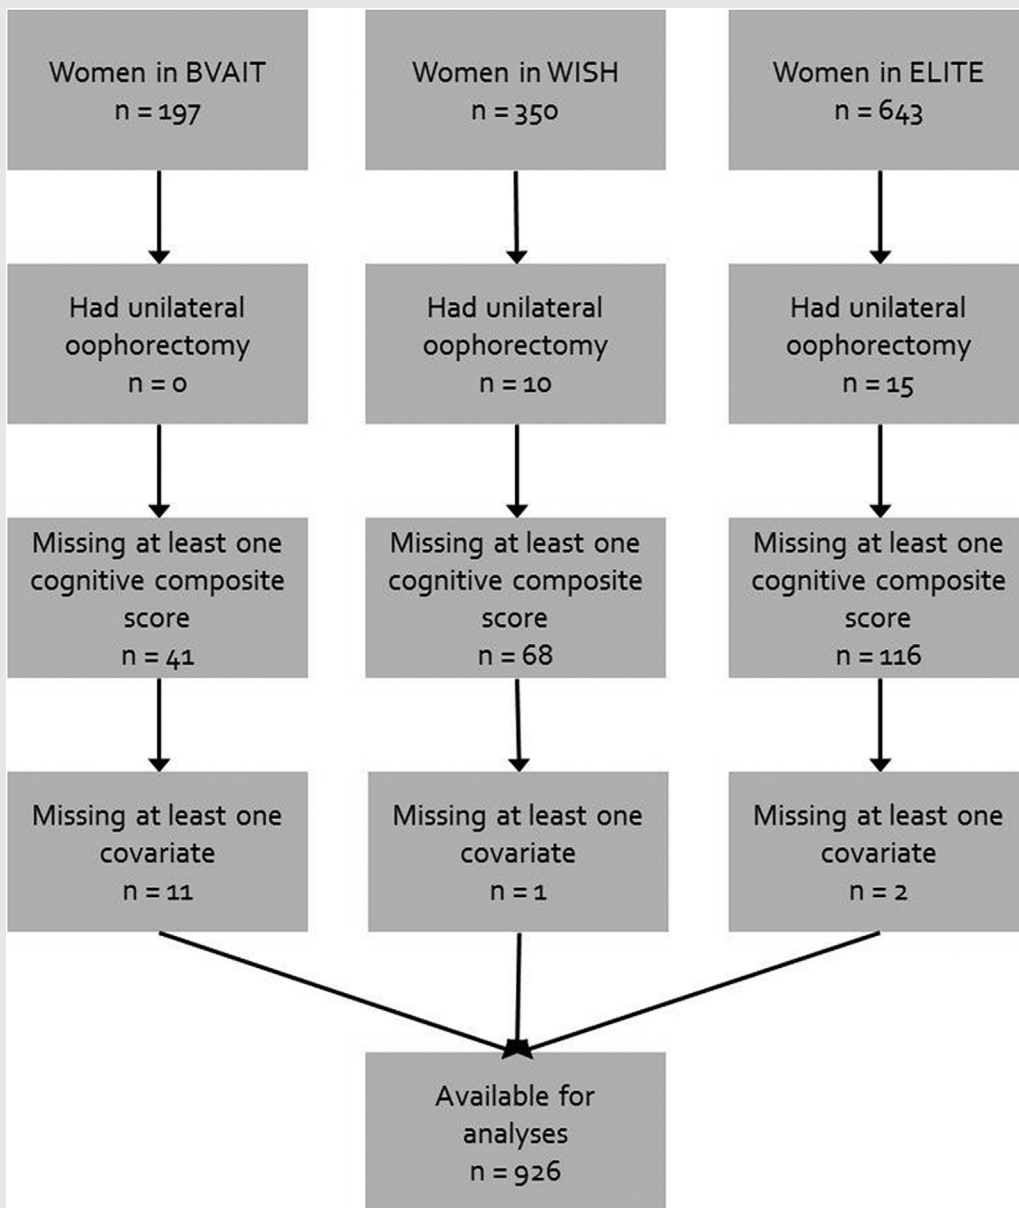

Participants in the study.

Kurita. Cognitive function after oophorectomy. *Fertil Steril* 2016.

## SUPPLEMENTAL TABLE 1

## Cognitive tests.

| Test                                                         | Executive functioning | Verbal learning | Logical memory | Visual memory | Semantic memory | Global functioning |
|--------------------------------------------------------------|-----------------------|-----------------|----------------|---------------|-----------------|--------------------|
| Symbol Digit Modalities Test                                 | X                     |                 |                |               |                 | X                  |
| WMS-III Logical Memory I Paragraph Recall, Immediate Recall  |                       |                 | X              |               |                 | X                  |
| WMS-III Faces I                                              |                       |                 |                | X             |                 | X                  |
| WMS-III Letter-Number Sequencing                             | X                     |                 |                |               |                 | X                  |
| Judgment of Line Orientation                                 | X                     |                 |                |               |                 | X                  |
| Boston Naming Test (30 items)                                |                       |                 |                |               | X               | X                  |
| Trail Making Test Part B                                     | X                     |                 |                |               |                 | X                  |
| WMS-III, Logical Memory II Paragraph Recall, Delayed Recall  |                       |                 | X              |               |                 | X                  |
| WMS-III Faces II                                             |                       |                 |                | X             |                 | X                  |
| CVLT-II Immediate Recall                                     |                       | X               |                |               |                 | X                  |
| Wechsler Adult Intelligence Scale, 3rd ed., Block Design     | X                     |                 |                |               |                 | X                  |
| Category Fluency (animal naming, 60 s)                       |                       |                 |                |               | X               | X                  |
| Shipley Institute of Living Scale Abstraction Subset Part II | X                     |                 |                |               |                 | X                  |
| CVLT-II Delayed Recall                                       |                       | X               |                |               |                 | X                  |

Note: CVLT-II = California Verbal Learning Test, 2nd ed.; WMS-III = Wechsler Memory Scale, 3rd ed.

Kurita. Cognitive function after oophorectomy. *Fertil Steril* 2016.
